# Supplementary material for: From single-point to three-point halogen bonding between zinc(ii) tetrathiocyanate and tetrabromomethane
Source: Royal Society of Chemistry journal article supplement (doi:10.1039/c5ce02125a), 2015-12-03
Supplement: c5ce02125a1.pdf [file c5ce02125a1.pdf]

Supporting Information

for the article

**From single-point to three-point halogen bonding between  
zinc(II) tetrathiocyanate and tetrabromomethane.**

*Sergiy V Rosokha,<sup>1\*</sup> Charlotte L. Stern,<sup>2</sup> Michael K. Vinacos<sup>1,3</sup>*

---

<sup>1</sup> Department of Biological, Chemical and Physical Sciences Roosevelt University, Chicago, IL, 60605,  
USA E-mail: [srosokha@roosevelt.edu](mailto:srosokha@roosevelt.edu)

<sup>2</sup> Department of Chemistry, Northwestern University, Evanston, Illinois 60208

<sup>3</sup> Current address: Particle Technology Labs, Downers Grove, IL, 606015

Table S1. Energies, ZPE and BSSE (in Hartrees) of the halogen-bonded complexes and their components.

|                                                       | N | E             | ZPE      | BSSE     |
|-------------------------------------------------------|---|---------------|----------|----------|
| $\omega$ B97XD, gas phase                             |   |               |          |          |
| Zn(NCS <sub>4</sub> ) <sup>2-</sup> ·CBr <sub>4</sub> | 3 | -14078.733575 | 0.049112 | 0.001091 |
| Zn(NCS <sub>4</sub> ) <sup>2-</sup> ·CBr <sub>4</sub> | 2 | -14078.732163 | 0.049156 | 0.000773 |
| NCS <sup>-</sup> ·CBr <sub>4</sub>                    | 1 | -10825.955729 | 0.016304 | 0.000426 |
| Zn(NCS <sub>4</sub> ) <sup>2-</sup>                   | - | -3743.961454  | 0.041008 |          |
| CBr <sub>4</sub>                                      | - | -10334.762810 | 0.007184 |          |
| NCS <sup>-</sup>                                      | - | -491.187510   | 0.008770 |          |
| M062X, gas phase                                      |   |               |          |          |
| Zn(NCS <sub>4</sub> ) <sup>2-</sup> ·CBr <sub>4</sub> | 3 | -14078.459958 | 0.049812 | 0.001194 |
| Zn(NCS <sub>4</sub> ) <sup>2-</sup> ·CBr <sub>4</sub> | 2 | -14078.459652 | 0.049689 | 0.000814 |
| NCS <sup>-</sup> ·CBr <sub>4</sub>                    | 1 | -10825.859835 | 0.016850 | 0.000531 |
| Zn(NCS <sub>4</sub> ) <sup>2-</sup>                   | - | -3743.696774  | 0.041786 |          |
| CBr <sub>4</sub>                                      | - | -10334.742253 | 0.007237 |          |
| NCS <sup>-</sup>                                      | - | -491.098064   | 0.008729 |          |
| $\omega$ B97XD, dichloromethane                       |   |               |          |          |
| Zn(NCS <sub>4</sub> ) <sup>2-</sup> ·CBr <sub>4</sub> | 3 | -14078.555092 | 0.049565 | 0.000783 |
| Zn(NCS <sub>4</sub> ) <sup>2-</sup> ·CBr <sub>4</sub> | 2 | -14078.555030 | 0.049591 | 0.000783 |
| NCS <sup>-</sup> ·CBr <sub>4</sub>                    | 1 | -10825.885100 | 0.016378 | 0.000531 |
| Zn(NCS <sub>4</sub> ) <sup>2-</sup>                   | - | -3743.775405  | 0.041717 |          |
| CBr <sub>4</sub>                                      | - | -10334.761269 | 0.007277 |          |
| NCS <sup>-</sup>                                      | - | -491.105591   | 0.008779 |          |

Atomic coordinates of the calculated halogen-bonded  $\text{Zn}(\text{NCS}_4)^{2-} \cdot \text{CBr}_4$  complexes

Three-point bonded  $\text{Zn}(\text{NCS}_4)^{2-} \cdot \text{CBr}_4$  ωB97XD, gas phase

|    |             |             |             |
|----|-------------|-------------|-------------|
| Br | 1.85806700  | -0.52302100 | -1.75034500 |
| Br | 1.83389700  | -1.22454200 | 1.33935800  |
| Br | 1.90075800  | 1.80284800  | 0.40302700  |
| Br | 4.48745500  | -0.03610700 | 0.00530000  |
| C  | 2.51178200  | 0.00505700  | -0.00076200 |
| Zn | -2.66330900 | -0.01133700 | 0.00235200  |
| S  | -0.69663900 | -1.30454800 | -4.16757800 |
| S  | -7.45217300 | 0.02197400  | -0.00630000 |
| S  | -0.71102200 | 4.25726600  | 0.96012300  |
| S  | -0.69428100 | -2.96854500 | 3.20904200  |
| N  | -1.97907000 | -0.57494700 | -1.78127700 |
| N  | -4.64756700 | 0.00838800  | -0.00093800 |
| N  | -1.95881700 | 1.80481900  | 0.41257300  |
| N  | -1.99269300 | -1.28279400 | 1.38043200  |
| C  | -1.45403900 | -0.88018300 | -2.77832400 |
| C  | -5.81616500 | 0.01427900  | -0.00332400 |
| C  | -1.44610800 | 2.82845900  | 0.64142800  |
| C  | -1.46114600 | -1.98723600 | 2.14471300  |

Two-point bonded  $\text{Zn}(\text{NCS}_4)^{2-} \cdot \text{CBr}_4$  ωB97XD, gas phase

|    |             |             |             |
|----|-------------|-------------|-------------|
| Zn | 3.23470500  | 0.00007200  | 0.00029800  |
| S  | 0.34493700  | 0.05181100  | -3.83833900 |
| S  | 0.34420400  | -0.06305500 | 3.83865600  |
| S  | 5.99142900  | 3.91325100  | 0.05649000  |
| S  | 6.00633700  | -3.90252400 | -0.05651600 |
| N  | 2.06438400  | 0.02089400  | -1.61938200 |
| N  | 2.06508100  | -0.02614800 | 1.62087000  |
| N  | 4.36205900  | 1.63148700  | 0.02434900  |
| N  | 4.37005400  | -1.62575600 | -0.02282800 |
| C  | 1.35548200  | 0.03398900  | -2.54537800 |
| C  | 1.35011700  | -0.04333200 | 2.54193300  |
| C  | 5.04129400  | 2.58265100  | 0.03773500  |
| C  | 5.05223000  | -2.57477100 | -0.03710400 |
| Br | -2.05682100 | 0.02225600  | -1.58496500 |
| Br | -2.05901800 | -0.02518300 | 1.58610200  |
| Br | -4.34120100 | -1.58635700 | -0.02455600 |
| Br | -4.33697400 | 1.58958600  | 0.02292800  |
| C  | -3.17783100 | 0.00016300  | -0.00010000 |

Three-point bonded  $\text{Zn}(\text{NCS}_4)^{2-} \cdot \text{CBr}_4$  M062X, gas phase

|    |             |             |             |
|----|-------------|-------------|-------------|
| Br | 1.78996300  | -0.51883200 | 1.75576900  |
| Br | 1.78392800  | 1.77964500  | -0.42648300 |
| Br | 1.78272900  | -1.25941000 | -1.32576500 |
| Br | 4.41164500  | 0.00155100  | -0.00533200 |
| C  | 2.43512200  | 0.00072500  | -0.00040800 |
| Zn | -2.61226500 | -0.00072600 | 0.00013000  |
| S  | -0.56975700 | -1.24274800 | 4.17405400  |
| S  | -7.42526800 | 0.00177400  | 0.00032400  |
| S  | -0.57243600 | -2.99932400 | -3.15905600 |
| S  | -0.57495500 | 4.23741700  | -1.01191700 |
| N  | -1.91081100 | -0.53961200 | 1.81191100  |
| N  | -4.62050700 | -0.00051800 | 0.00116600  |
| N  | -1.91423300 | -1.30127800 | -1.37339900 |
| N  | -1.91279000 | 1.83840900  | -0.43982100 |
| C  | -1.36542500 | -0.83379100 | 2.80002300  |
| C  | -5.78812500 | 0.00027500  | 0.00075400  |
| C  | -1.36852200 | -2.01161300 | -2.12036000 |
| C  | -1.36876800 | 2.84198500  | -0.67900400 |

Two-point bonded  $\text{Zn}(\text{NCS}_4)^{2-} \cdot \text{CBr}_4$  M062X, gas phase

|    |             |             |             |
|----|-------------|-------------|-------------|
| Zn | -3.18006600 | -0.00011400 | -0.00001400 |
| S  | -0.28942800 | 0.39008200  | 3.85014600  |
| S  | -0.28942200 | -0.39426100 | -3.84977300 |
| S  | -5.96860500 | 3.90041100  | -0.38729800 |
| S  | -5.97639600 | -3.89514400 | 0.38684100  |
| N  | -1.99198600 | 0.16136600  | 1.62871000  |
| N  | -1.99196300 | -0.16435300 | -1.62844600 |
| N  | -4.32369500 | 1.64028200  | -0.16273300 |
| N  | -4.32742700 | -1.63795100 | 0.16241500  |
| C  | -1.29221300 | 0.25671600  | 2.55545700  |
| C  | -1.29218000 | -0.26013900 | -2.55514100 |
| C  | -5.00855100 | 2.58161200  | -0.25613000 |
| C  | -5.01404600 | -2.57799400 | 0.25582300  |
| Br | 2.01181900  | 0.16470700  | 1.57999500  |
| Br | 2.01181400  | -0.16572700 | -1.57986500 |
| Br | 4.29026800  | -1.57781400 | 0.16553400  |
| Br | 4.28907400  | 1.57854400  | -0.16560400 |
| C  | 3.12781500  | -0.00006300 | 0.00001500  |

Three-point bonded  $\text{Zn}(\text{NCS}_4)^{2-} \cdot \text{CBr}_4$  ωB97XD,  $\text{CH}_2\text{Cl}_2$

|    |             |             |             |
|----|-------------|-------------|-------------|
| Zn | -3.15104600 | 0.00003400  | 0.00009300  |
| S  | -0.43255800 | 3.81860400  | 0.98810500  |
| S  | -0.43257100 | -3.81839500 | -0.98849400 |
| S  | -5.91995900 | 0.99962000  | -3.77489500 |
| S  | -5.92059100 | -0.99971700 | 3.77456300  |
| N  | -2.00672400 | 1.57251200  | 0.41301800  |
| N  | -2.00668800 | -1.57243100 | -0.41278100 |
| N  | -4.30356700 | 0.41344100  | -1.56324200 |
| N  | -4.30366600 | -0.41339400 | 1.56333900  |
| C  | -1.35627200 | 2.51218100  | 0.65378400  |
| C  | -1.35627800 | -2.51205600 | -0.65383400 |
| C  | -4.97797000 | 0.65837100  | -2.48633500 |
| C  | -4.97826100 | -0.65839300 | 2.48627400  |
| Br | 2.03535300  | 1.53625200  | 0.39544700  |
| Br | 2.03538000  | -1.53622500 | -0.39577000 |
| Br | 4.29571700  | -0.39625400 | 1.53856600  |
| Br | 4.29632900  | 0.39610800  | -1.53804900 |
| C  | 3.16370100  | -0.00002800 | 0.00004400  |

Two-point bonded  $\text{Zn}(\text{NCS}_4)^{2-} \cdot \text{CBr}_4$  ωB97XD,  $\text{CH}_2\text{Cl}_2$

|    |             |             |             |
|----|-------------|-------------|-------------|
| Zn | -3.15104600 | 0.00003400  | 0.00009300  |
| S  | -0.43255800 | 3.81860400  | 0.98810500  |
| S  | -0.43257100 | -3.81839500 | -0.98849400 |
| S  | -5.91995900 | 0.99962000  | -3.77489500 |
| S  | -5.92059100 | -0.99971700 | 3.77456300  |
| N  | -2.00672400 | 1.57251200  | 0.41301800  |
| N  | -2.00668800 | -1.57243100 | -0.41278100 |
| N  | -4.30356700 | 0.41344100  | -1.56324200 |
| N  | -4.30366600 | -0.41339400 | 1.56333900  |
| C  | -1.35627200 | 2.51218100  | 0.65378400  |
| C  | -1.35627800 | -2.51205600 | -0.65383400 |
| C  | -4.97797000 | 0.65837100  | -2.48633500 |
| C  | -4.97826100 | -0.65839300 | 2.48627400  |
| Br | 2.03535300  | 1.53625200  | 0.39544700  |
| Br | 2.03538000  | -1.53622500 | -0.39577000 |
| Br | 4.29571700  | -0.39625400 | 1.53856600  |
| Br | 4.29632900  | 0.39610800  | -1.53804900 |
| C  | 3.16370100  | -0.00002800 | 0.00004400  |

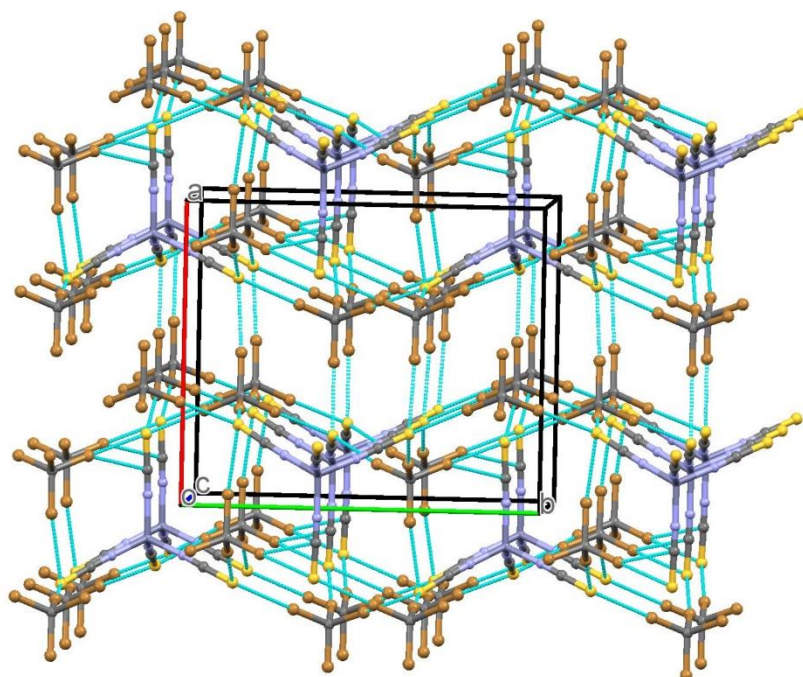

Figure S1. 3D-honeycomb network in the  $(\text{Bu}_4\text{N})_2[\text{Zn}(\text{NCS})_4] \cdot 3\text{CBr}_4$  co-crystals (view nearly along c axes). Halogen bonds are shown as blue lines and  $\text{Bu}_4\text{N}^+$  cations are omitted for clarity

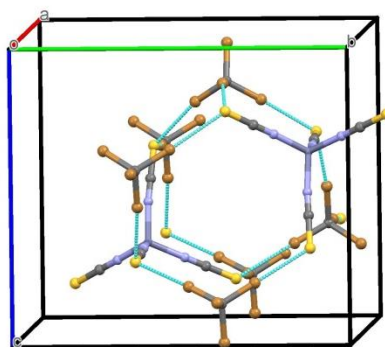

Figure S2. Fragment of the crystal structure of the  $(\text{Bu}_4\text{N})_2[\text{Zn}(\text{NCS})_4] \cdot 3\text{CBr}_4$  co-crystals showing two types of rings formed by single-point and double-point halogen bonding.

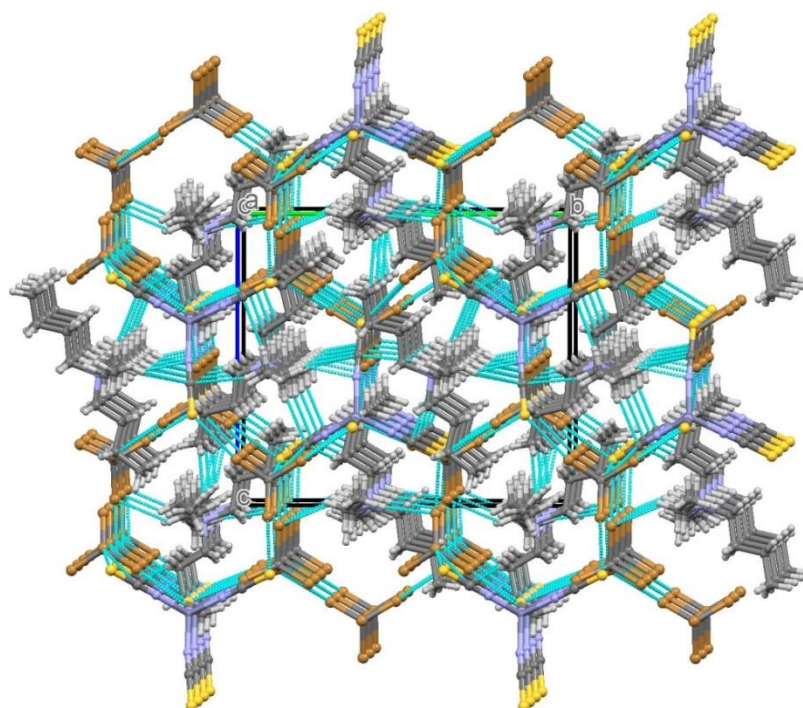

Figure S3. Honeycomb-like network in the  $(\text{Bu}_4\text{N})_2[\text{Zn}(\text{NCS})_4] \cdot 3\text{CBr}_4$  co-crystals in which channels are filled with  $\text{Bu}_4\text{N}^+$  counterions.

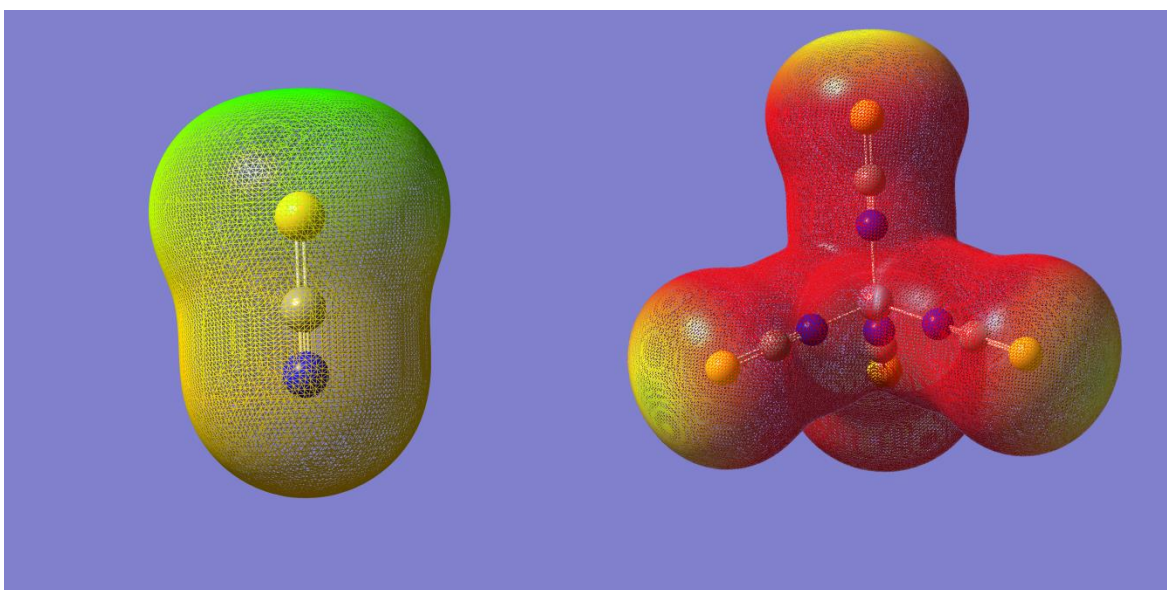

Figure S4. Surface electrostatic potential of  $\text{NCS}^-$  and  $[\text{Zn}(\text{NCS})_4]^{2-}$  calculated at calculated at isovalue 0.0004. ESP values: red: -110 to -120 kcal/mol, yellow-100 to -110 kca/mol, green: -90 top -100 kcal/mol.
